# Supplementary material for: Eco-synthesis of green silver nanoparticles using natural extracts and its application as co-catalyst in photocatalytic hydrogen production
Source: Royal Society of Chemistry journal article supplement (doi:10.1039/d4ra05675b), 2024-01-01
Supplement: d4ra05675b1.pdf [file d4ra05675b1.pdf]

## Supporting Information

### ECO-SYNTHESIS OF GREEN SILVER NANOPARTICLES USING NATURAL EXTRACTS AND ITS APPLICATION AS CO-CATALYST IN PHOTOCATALYTIC HYDROGEN PRODUCTION

*Phuong N. Nguyen*<sup>1,2\*</sup>, *Thao Quynh Ngan Tran*<sup>3</sup>, *Khoa Hai Le*<sup>4</sup>, *Diem T. Khong*<sup>3</sup>, *Hoai Phuong Pham*<sup>5</sup>, *Quang V. Dang*<sup>6,7</sup>, *Quang-Hieu Tran*<sup>8</sup>, *Tuan M. Nguyen*<sup>2,9\*</sup>, *Nam Nguyen Dang*<sup>10,11</sup>

<sup>1</sup>Institute of Applied Materials Science, Vietnam Academy of Science and Technology (VAST), 29TL Street, Ward Thanh Loc, District 12, Ho Chi Minh City, Viet Nam.

<sup>2</sup>Graduate University of Science and Technology, Vietnam Academy of Science and Technology, 18 Hoang Quoc Viet Street, Cau Giay, Ha Noi, Vietnam.

<sup>3</sup>Industrial University of Ho Chi Minh City, No. 12 Nguyen Van Bao, Ward 4, Go Vap District, Ho Chi Minh City, Vietnam

<sup>4</sup>Institute for Tropical Technology, Vietnam Academy of Science and Technology (VAST), 18 Hoang Quoc Viet, Cau Giay, Ha Noi.

<sup>5</sup>NTT Hi-Tech Institute, Nguyen Tat Thanh University, 298-300A Nguyen Tat Thanh Street, Ward 13, District 4, Ho Chi Minh City 70000, Vietnam

<sup>6</sup>Faculty of Materials Science and Technology, University of Science, 227 Nguyen Van Cu Str., Dist. 5, Ho Chi Minh City, Vietnam.

<sup>7</sup>Vietnam National University, Ho Chi Minh (VNU-HCM), Linh Trung Ward, Thu Duc District, Ho Chi Minh City 70000, Vietnam

<sup>8</sup>Basic Sciences Department-Saigon Technology University, Ho Chi Minh City 700000, Vietnam, 180 Cao Lo, Ward 4, District 8, Ho Chi Minh City, Vietnam

<sup>9</sup>National Institute of Applied Mechanics and Informatics, Vietnam Academy of Science and Technology (VAST), 291 Dien Bien Phu Street, Ward 7, District 3, Ho Chi Minh City 70000, Vietnam.

<sup>10</sup>Future Materials & Devices Lab., Institute of Fundamental and Applied Sciences, Duy Tan University, Ho Chi Minh City 70000, Vietnam

<sup>11</sup>The Faculty of Environmental and Chemical Engineering, Duy Tan University, Danang 50000, Vietnam

#### Corresponding Author

\*Email addresses: [nguyenngocphuong@iams.vast.vn](mailto:nguyenngocphuong@iams.vast.vn) and [nguyenmanhtuan@iams.vast.vn](mailto:nguyenmanhtuan@iams.vast.vn)

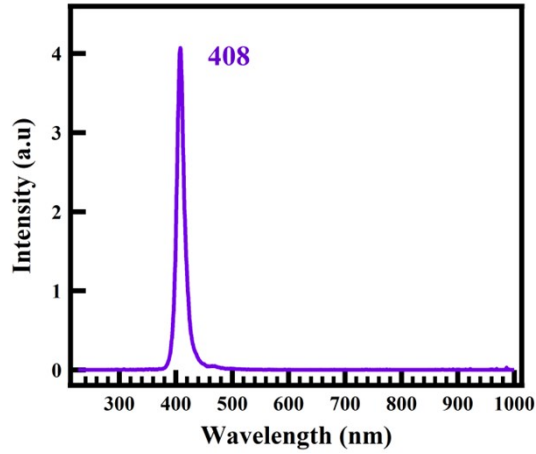

Figure S1: Light source spectrum of the photo-irradiation system used in the experiment (light intensity at a distance of 5 cm and 11 cm are 210W/m<sup>2</sup> and 78W/m<sup>2</sup>, respectively).

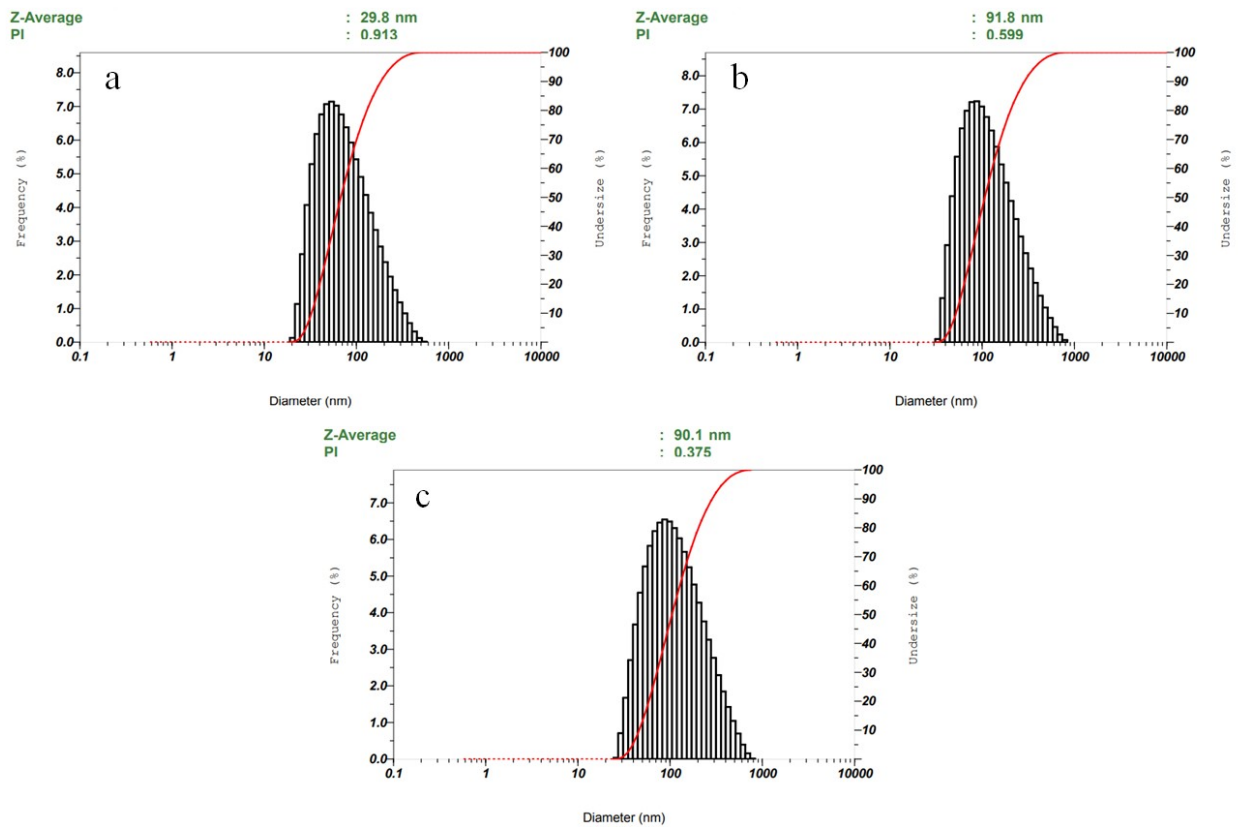

Figure S2: DLS spectra of AgNPs\_CC (a), AgNPs\_GT (b), AgNPs\_PP (c).

Calculating the particle size by Scherrer equation

$$d = \frac{k\lambda}{\beta \cos\theta}$$

Where, d: particle size

k: Scherrer constant (k=0.9)

$\lambda$ = 0.15418 nm

$\beta$ : full width at half maximum (FWHM) (radian)

$\theta$ : peak position (radian)

Table S1: The summary of the particle size of AgNPs\_CC, AgNPs\_GT, AgNPs\_PP.

|          | $\theta$ (degree) | FWHM (radian) | particle size (XRD patterns) (nm) | average particle size (SEM images) (nm) | average particle size (DLS measurement) (nm) |
|----------|-------------------|---------------|-----------------------------------|-----------------------------------------|----------------------------------------------|
| AgNPs_CC | 38.145            | 0.62          | 17.26                             | 12 - 25                                 | 29.8                                         |
| AgNPs_GT | 38.313            | 1.01          | 10.43                             | 20 - 95                                 | 91.8                                         |
| AgNPs_PP | 38.125            | 0.77          | 11.40                             | 10 - 45                                 | 90.1                                         |

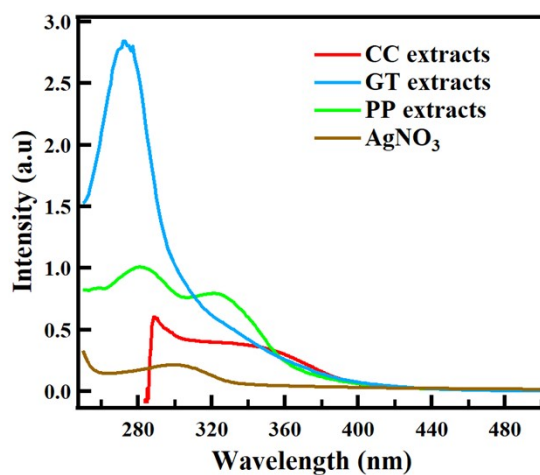

Figure S3: UV-vis spectra of CC leaf extracts, GT leaf extracts, PP leaf extracts and AgNO<sub>3</sub>.
